# Supplementary material for: Covalent lindqvist polyoxometalate-cubic polyhedral oligomeric silsesquioxane hybrid material: enhancing photocatalytic antibacterial activity and hydrogen production as a heterogeneous catalyst
Source: Royal Society of Chemistry journal article supplement (doi:10.1039/d3nj03807f), 2023-01-01
Supplement: d3nj03807f1.pdf [file d3nj03807f1.pdf]

## **Electronic Supplementary Information**

### **Covalent Lindqvist Polyoxometalate-Cubic Polyhedral Oligomeric Silsesquioxane Hybrid Material: Enhancing Photocatalytic Antibacterial Activity and Hydrogen Production as a Heterogeneous Catalyst**

**Prabu Rajendran,<sup>a</sup> Dhandapani Perumal,<sup>b</sup> Swaminathan Shanmugan<sup>\*a</sup>**

<sup>a</sup>Department of Chemistry, Faculty of Engineering and Technology, SRM Institute of Science and Technology, Kattankulathur, Chengalpattu 603203, Tamil Nadu, India.

E-mail: shanmugs2@srmist.edu.in, shanmugan0408@gmail.com

<sup>b</sup>Environmental Molecular Microbiology Research Laboratory, Department of Biotechnology, Thiruvalluvar University, Serkkadu, Vellore, 632115, Tamil Nadu, India.

## Contents

Synthesis of tetrabutyl ammonium hexamolybdate [LPOM(Mo)].

Synthesis of heptaisobutylpropylamine-T8-Silsesquioxane (POSS-NH<sub>2</sub>).

**Figure S1.** Photographs of synthesized materials (a) POSS-NH<sub>2</sub>, (b) LPOM(Mo) and (c) POM-POSS hybrid.

**Figure S2.** FT-IR spectra of POSS-NH<sub>2</sub>, LPOM(Mo) and POSS-POM hybrid material.

**Figure S3.** Enlarged FT-IR spectra of POM-POSS hybrid material.

**Figure S4.** Combined <sup>1</sup>H NMR spectrum of the POM-POSS, LPOM(Mo) and POSS-NH<sub>2</sub>.

**Figure S5.** <sup>1</sup>H NMR spectrum of the POSS-NH<sub>2</sub>.

**Figure S6.** <sup>1</sup>H NMR spectrum of LPOM(Mo).

**Figure S7.** <sup>13</sup>C NMR spectrum of the POM-POSS hybrid material.

**Figure S8.** Enlarged ESI-MS of POM- POSS (m/z between 700-1200).

**Figure S9.** HR-SEM micrographs of (a, b) POSS-NH<sub>2</sub> and (c, d) LPOM(Mo).

**Figure S10.** HR-TEM-EDAX spectrum of POM-POSS hybrid.

**Figure S11.** Epi-fluorescence micrographs of POM-POSS hybrid material inhibited bacterial growth in a time-dependent manner using dual staining of FITC and PI at ambient conditions, (a) after 5 mins at dark conditions, (b) sunlight exposure to tested photoreactor medium (POM-POSS hybrid and *E.coli* cells) at 30 mins and (c) over the 60 mins of sunlight exposure.

**Table. S1** Comparison of photocatalytic H<sub>2</sub> production with POM-based catalysts.

**Figure S12.** Schematic diagram of the photo-activated antibacterial experiment setup.

### Synthesis of tetrabutyl ammonium hexamolybdate [LPOM(Mo)]

2.5 g (10mmol) of sodium molybdate dehydrate ( $\text{Na}_2\text{MoO}_4 \cdot 2\text{H}_2\text{O}$ ) in 10 ml of water with 2.9 ml of 2N HCl (17.4mmol) stirred in 50 ml of RB flask at room temperature on one minute. A solution of 1.21g (3.7mmol) tetrabutylammonium bromide in 2 ml of water was added with vigorous stirring to cause the immediate formation of a white precipitate. The resulting residue was heated at 75 to 80°C with stirring until 45 minutes in this period, the white solid slowly turned to yellow. This crude product was washed using the suction filter with 20ml of water three times. The Air-dried crude product crystallized by dissolving in hot acetonitrile and cooled -20°C. After 24 hours, the yellow crystalline product was collected with suction filtration, washed twice with a 20 ml portion of diethyl ether, and dried using a vacuum. Yield: 1.82g (72.8%). FT-IR (KBr, 500-1000  $\text{cm}^{-1}$ ) 590.97(m), 738.83(m), 793.15(s), 881.02(m), 951.01(s).  $^1\text{H}$  NMR (500 MHz,  $\text{CDCl}_3$ , TMS, ppm):  $\delta$  = 0.98 (t, 3H,  $-\text{CH}_2\text{CH}_2\text{CH}_2\text{CH}_3$ ), 1.38 (m, 2H,  $-\text{CH}_2\text{CH}_2\text{CH}_2\text{CH}_3$ ), 1.62 (m, 2H,  $-\text{CH}_2\text{CH}_2\text{CH}_2\text{CH}_3$ ), 3.11 (t, 2H,  $-\text{CH}_2\text{CH}_2\text{CH}_2\text{CH}_3$ ).

### Synthesis of heptaisobutylpropylamine-T8-Silsesquioxane (POSS-NH<sub>2</sub>)

To a solution of 1,3,5,7,9,11,14-Heptaisobutyl tricyclo [7.3.3.1] heptasiloxane-endo-3,7,14-triol (2g, 2.53mmol) in dichloromethane (20mL), (3-Aminopropyl) trimethoxysilane (0.5ml, 2.79mmol) in dichloromethane (20 mL) was added under nitrogen atmosphere at RT. The reaction mixture was stirred for 48 hours, and the colourless solution evaporated under a vacuum to a colourless solid (POSS-NH<sub>2</sub>). Yield: 2.23g (89%). FT-IR (KBr,  $\text{cm}^{-1}$ ): 3390(br), 2955(s), 1579(br), 1465(m), 1332(w), 1231(m), 1113(s), 956(m), 837(m), 745(s), 687(w), 560(w), 482(m).  $^1\text{H}$  NMR (500 MHz,  $\text{CDCl}_3$ , TMS, ppm):  $\delta$  = 0.58 (t, 2H,  $-\text{CH}_2\text{CH}_2\text{CH}_2\text{NH}_2$ ), 0.60(d, 14H,-

CH<sub>2</sub>in<sup>i</sup>Bu), 0.95 (dd, 42H, -CH<sub>3</sub>), 1.55 (m, 2H, -CH<sub>2</sub>CH<sub>2</sub>CH<sub>2</sub>NH<sub>2</sub>), 1.85 (septet, 7H, -CH), 2.67 (t, 2H, -CH<sub>2</sub>CH<sub>2</sub>CH<sub>2</sub>NH<sub>2</sub>). <sup>13</sup>C NMR (100 MHz, CDCl<sub>3</sub>, TMS, ppm): δ = 44.9, 27.3, 25.8, 24.0, 22.6, and 9.3 (aliphatic-carbons). <sup>29</sup>Si NMR (79.30 MHz, CDCl<sub>3</sub>, TMS, ppm): δ = -67.8, -67.6, -67.2. Positive ion ESI-Mass m/z = 874.20 [POSS-NH<sub>2</sub>].

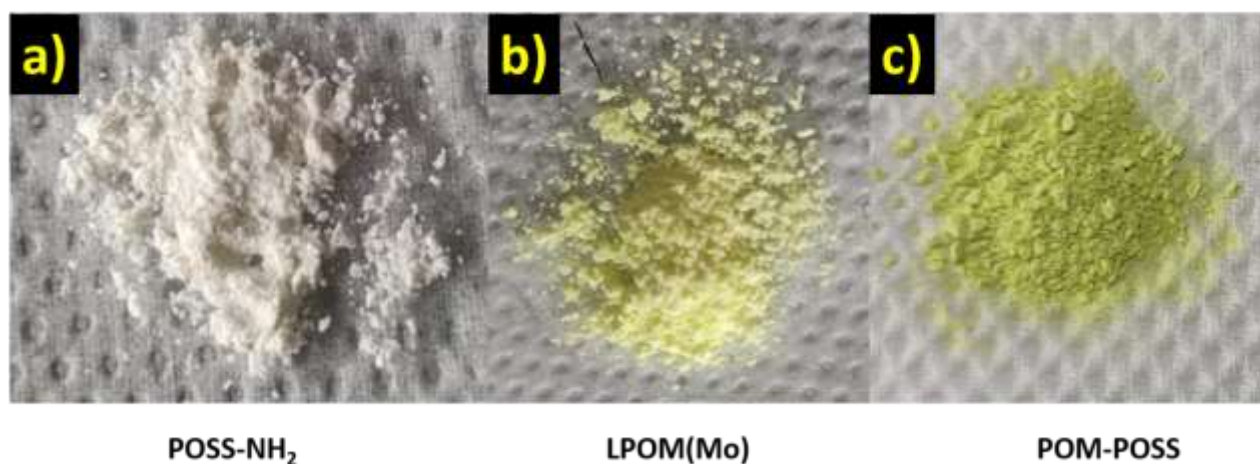

**Fig. S1.** Photographs of synthesized (a) POSS-NH<sub>2</sub>, (b) LPOM(Mo) and (c) POM-POSS hybrid material.

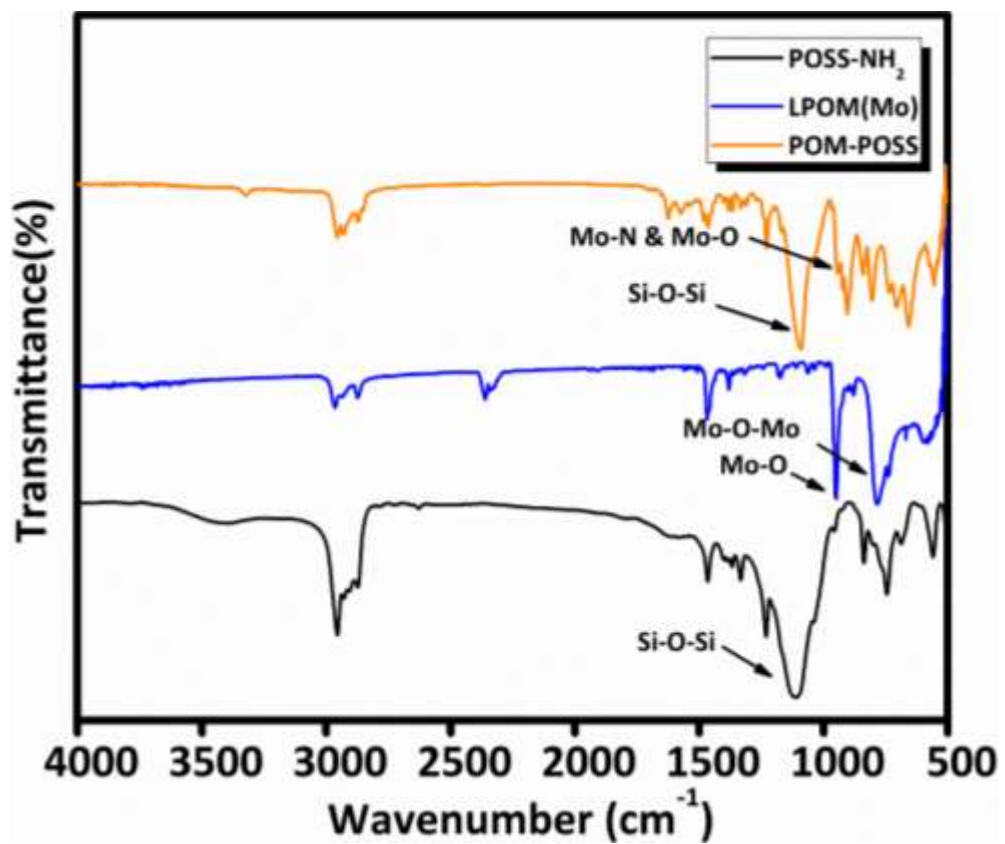

**Fig. S2.** FT-IR spectra of POSS-NH<sub>2</sub>, LPOM(Mo) and POSS-POM hybrid materials

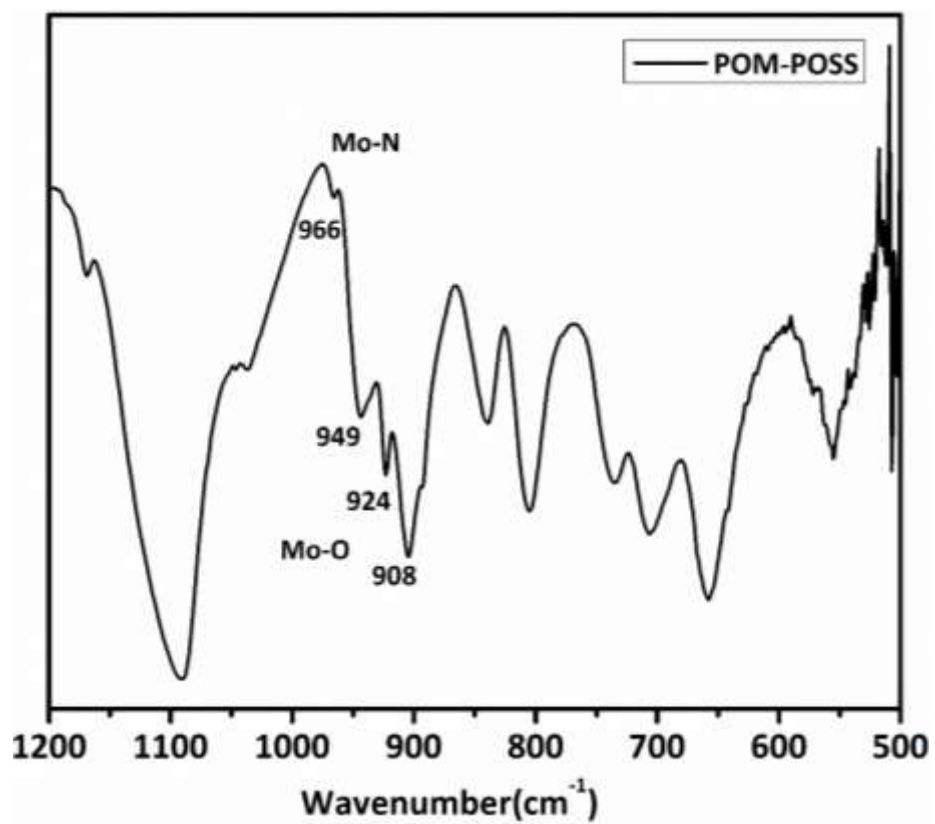

**Fig. S3.** Enlarged FT-IR spectra of POM-POSS hybrid materials

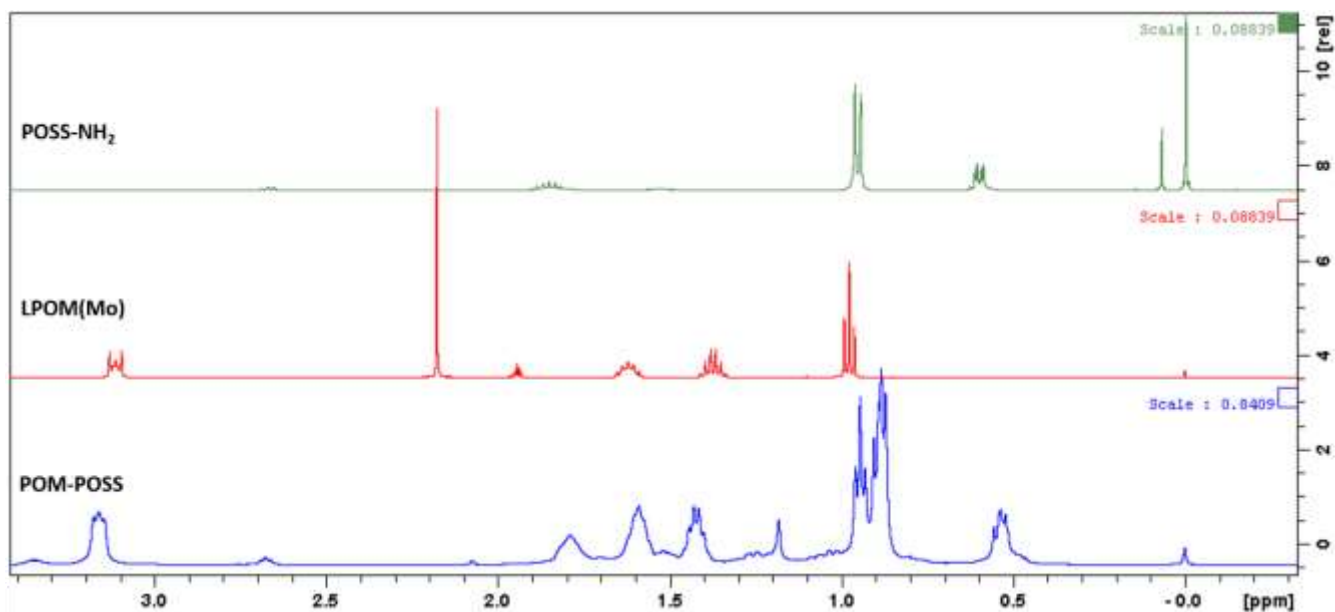

**Fig. S4.** Combined  $^1\text{H}$  NMR spectrum of the POM-POSS, LPOM(Mo) and POSS-NH<sub>2</sub>

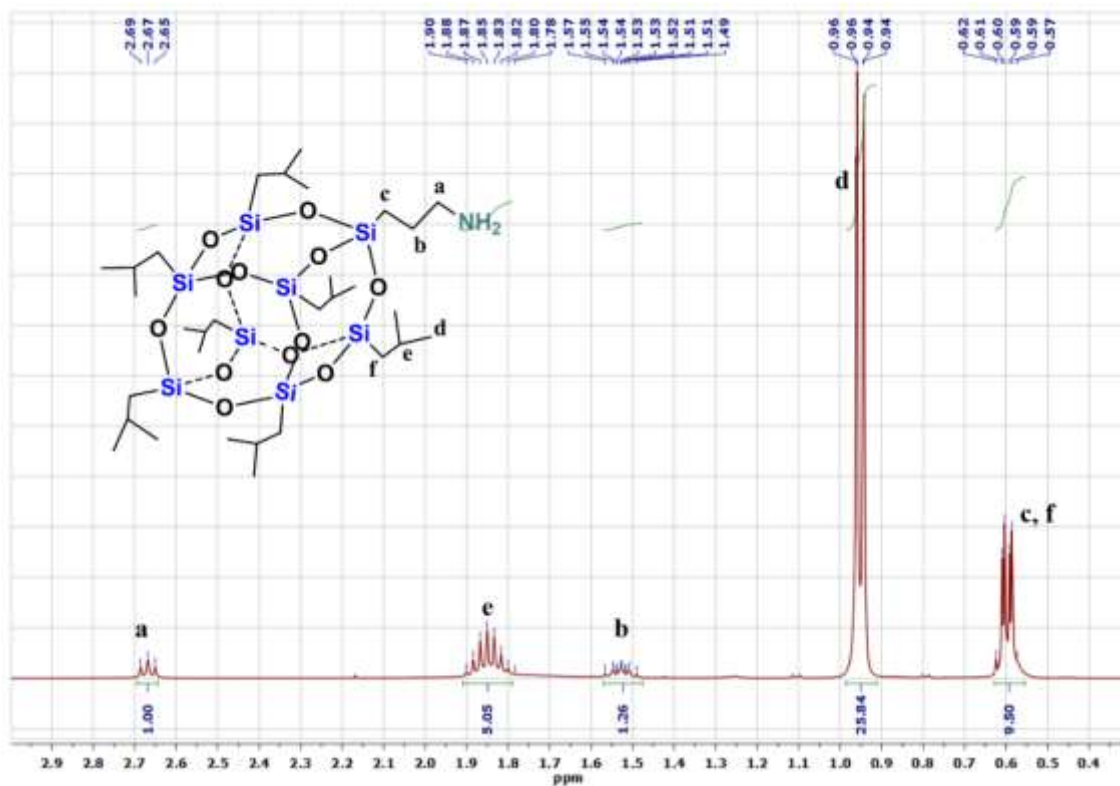

**Fig. S5.**  $^1\text{H}$  NMR spectrum of the POSS-NH<sub>2</sub>

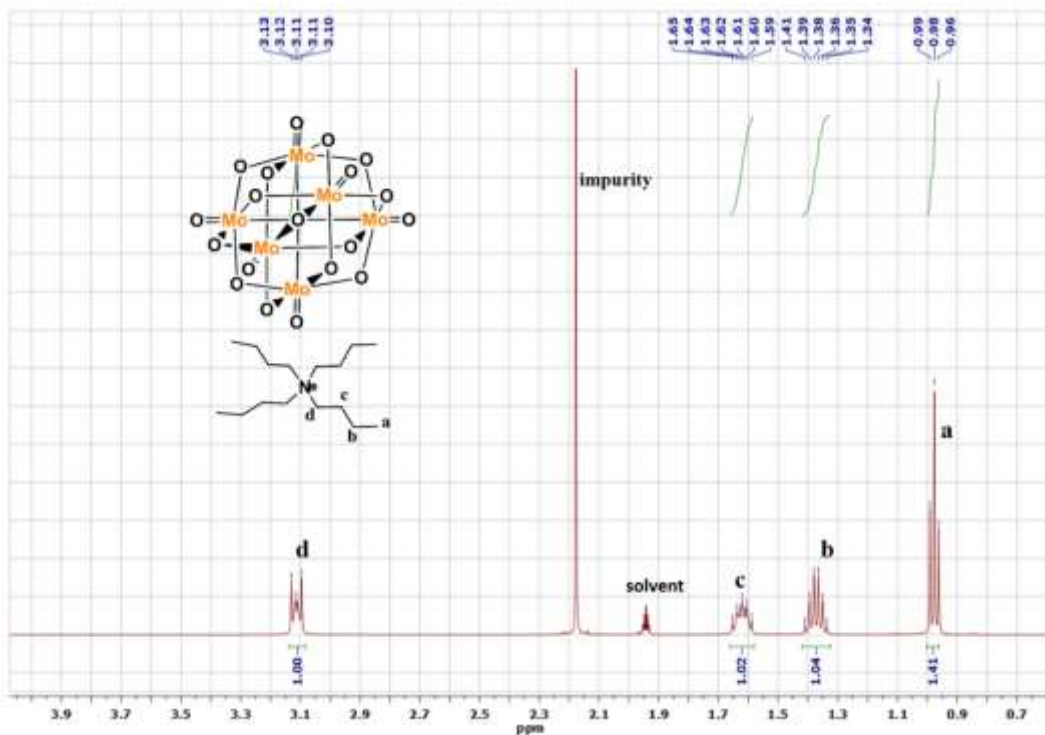

**Fig. S6.** <sup>1</sup>H NMR spectrum of LPOM(Mo)

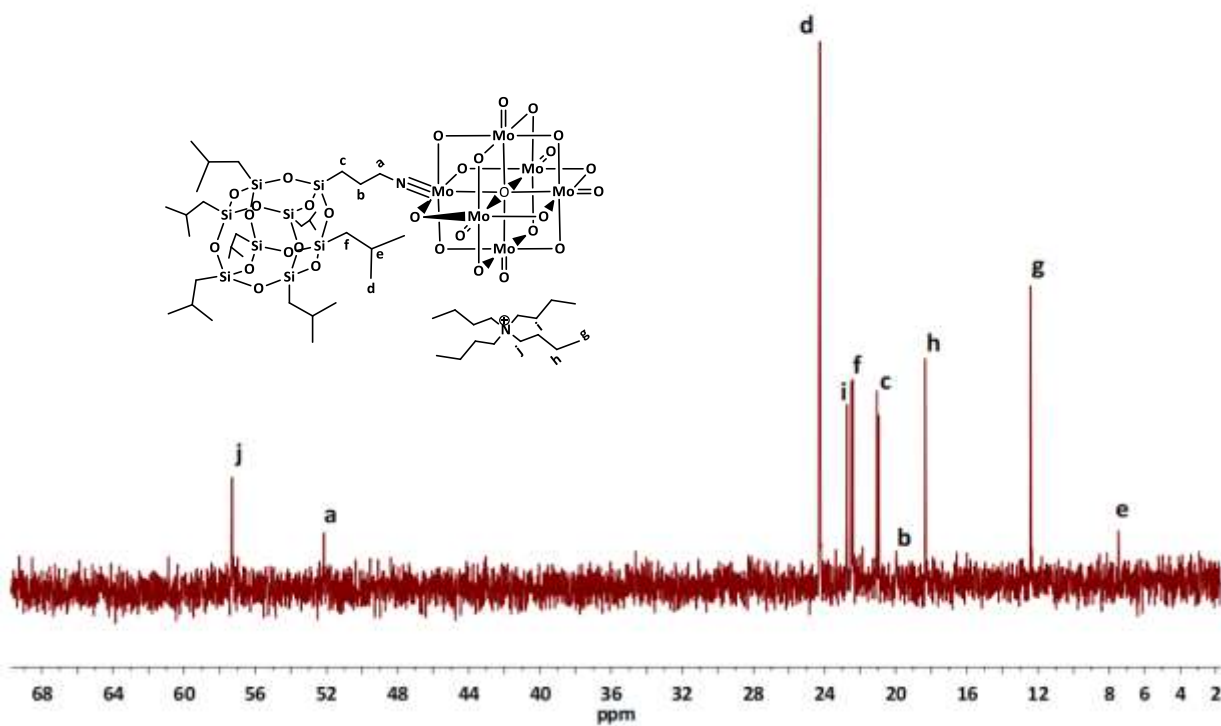

**Fig. S7.** <sup>13</sup>C NMR spectrum of the POM-POSS hybrid material.



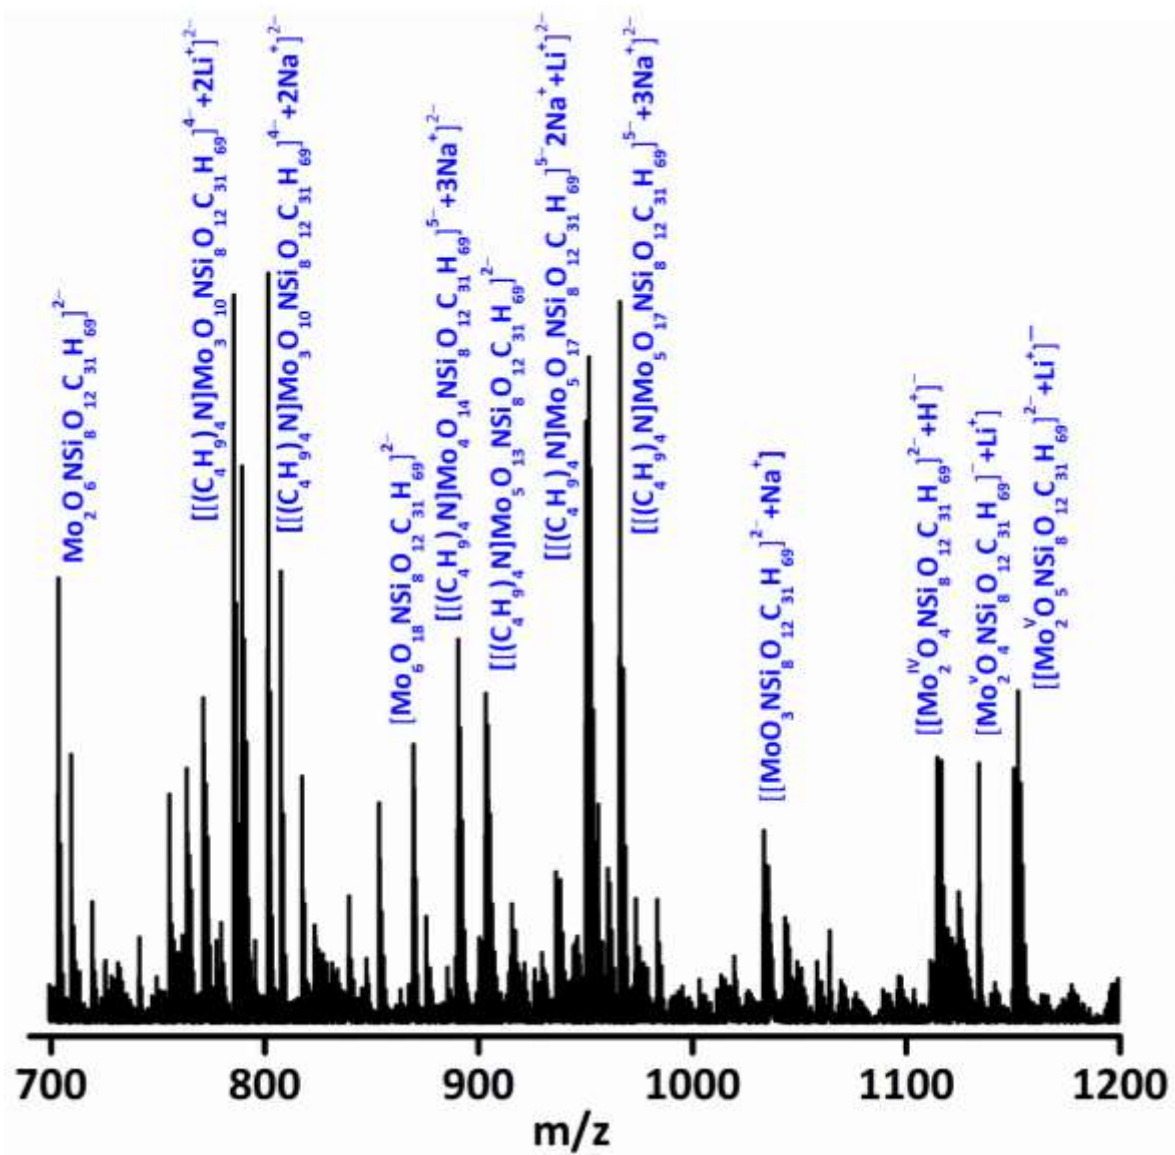

Fig. S8. Enlarged ESI-MS of POM- POSS (m/z between 700-1200) hybrid material.

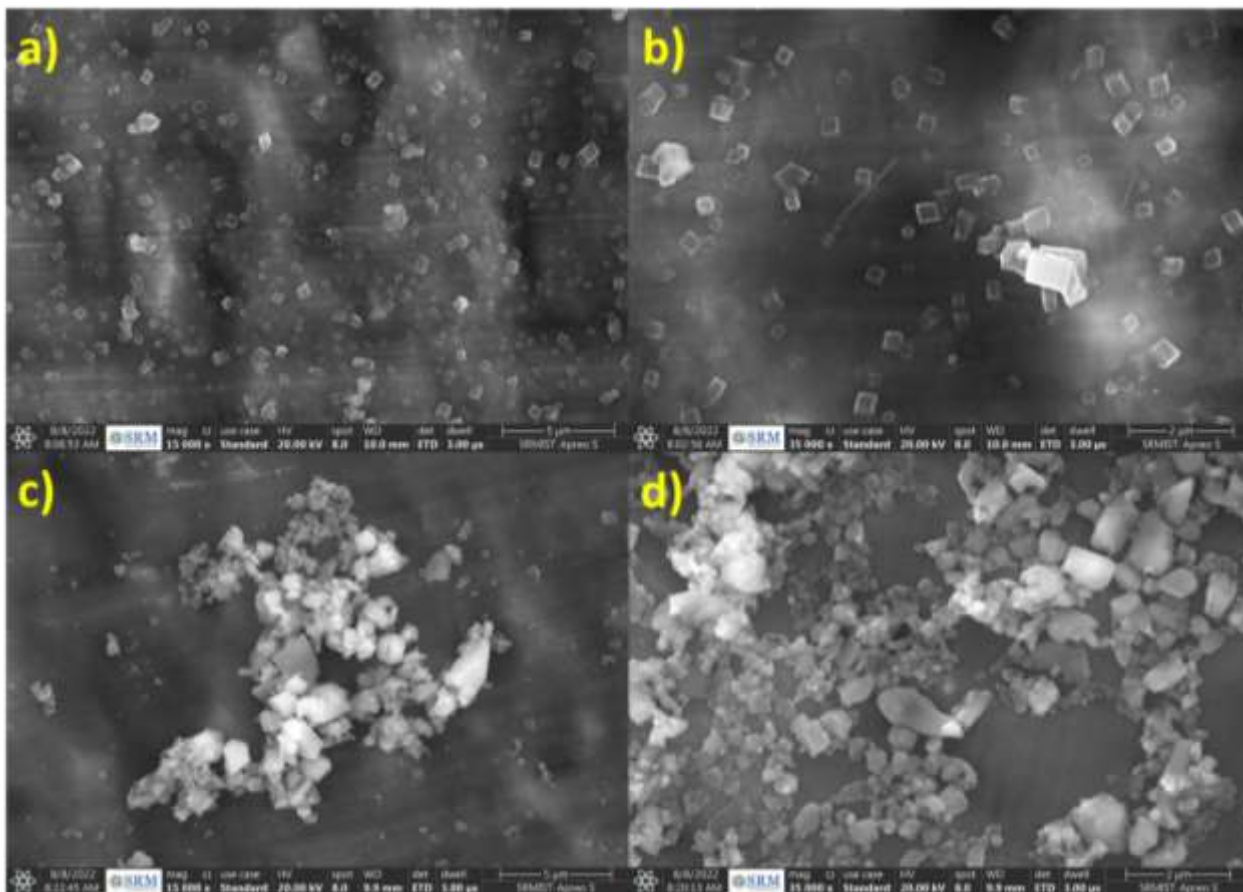

**Fig. S9.** HR-SEM micrographs of (a, b) POSS-NH<sub>2</sub> and (c, d) LPOM(Mo)

**Table. S1.** Atomic and weight percentage values of C, N, O, Si, and Mo in the POM-POSS hybrid

10/21/2023 4:38:39 PM

| Element | Line Type | k Factor | k Factor type | Absorption Correction | Wt%    | Wt% Sigma | Atomic % |
|---------|-----------|----------|---------------|-----------------------|--------|-----------|----------|
| C       | K series  | 2.769    |               | 1.00                  | 36.95  | 0.65      | 61.51    |
| N       | K series  | 3.515    |               | 1.00                  | 0.49   | 0.37      | 0.70     |
| O       | K series  | 2.020    |               | 1.00                  | 18.17  | 0.41      | 22.71    |
| Si      | K series  | 1.000    |               | 1.00                  | 11.58  | 0.27      | 8.24     |
| Mo      | K series  | 4.561    |               | 1.00                  | 32.81  | 0.73      | 6.84     |
| Total:  |           |          |               |                       | 100.00 |           | 100.00   |

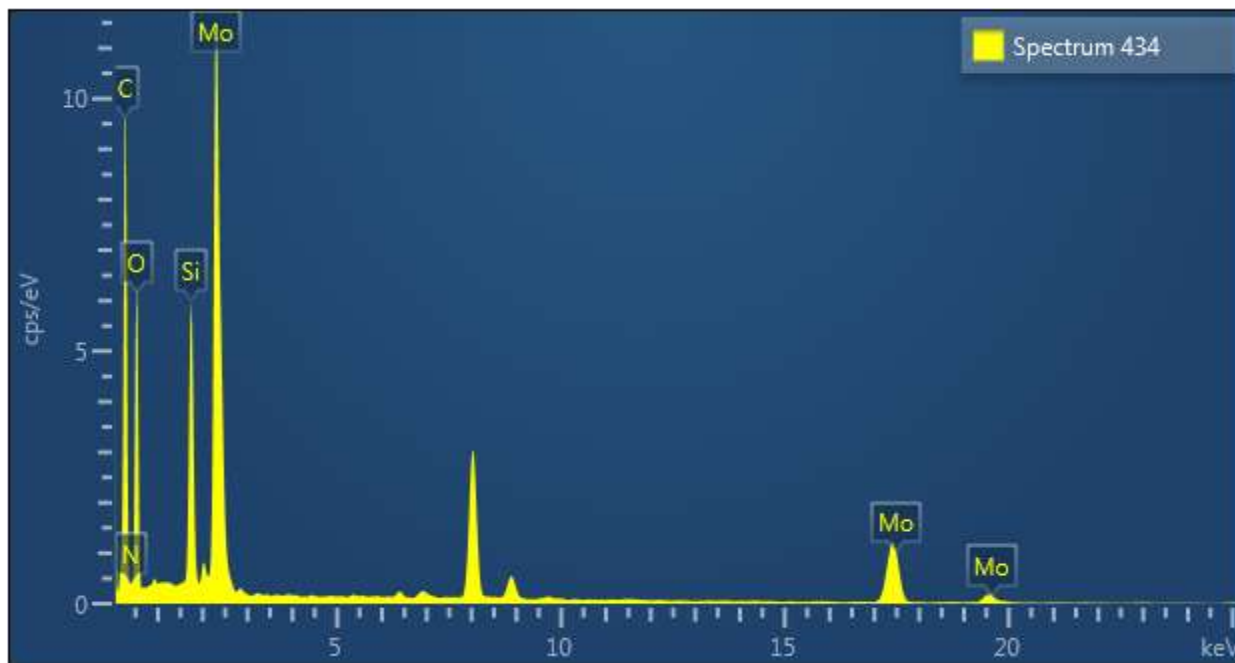

**Fig. S10.** HR-TEM-EDAX spectrum of POM-POSS hybrid material.

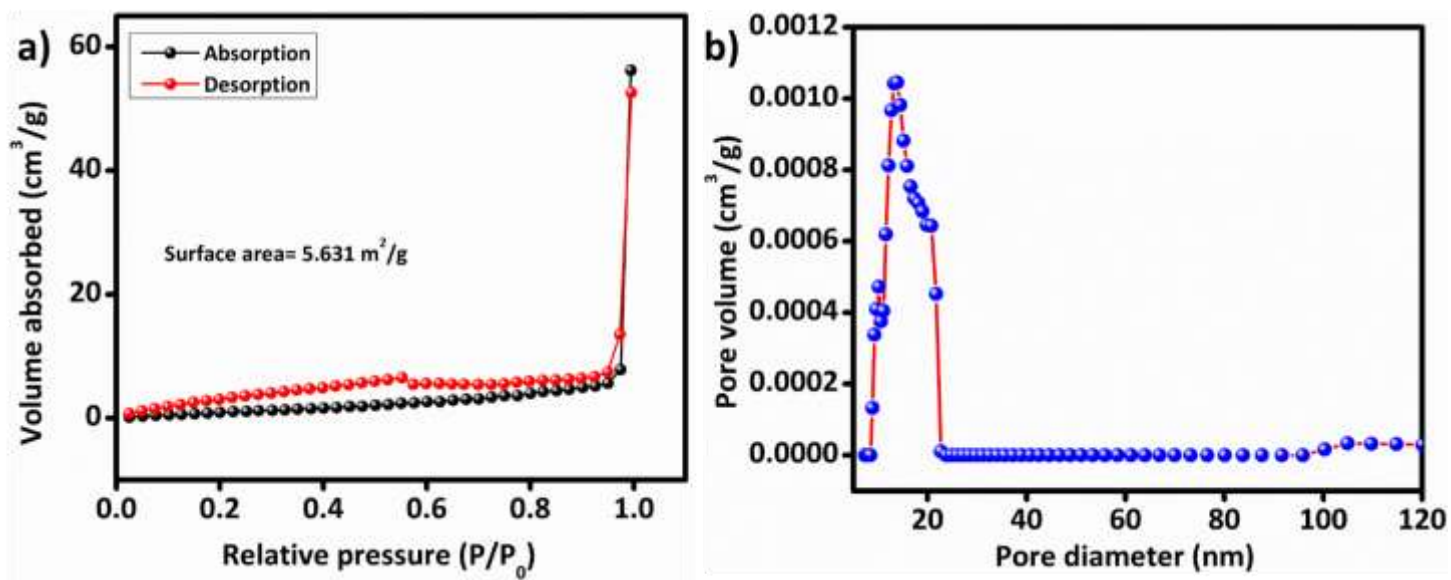

**Fig. S11.** Surface area and pore volume plots for the POM-POSS hybrid material.

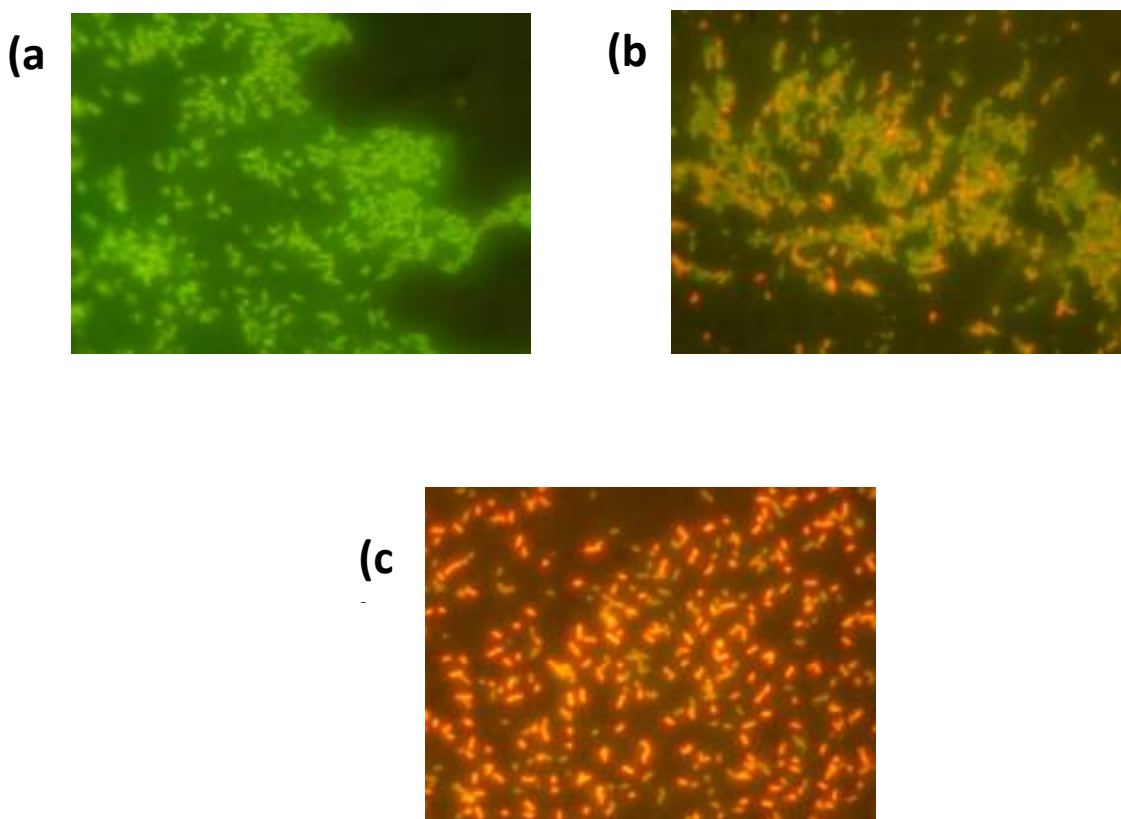

**Fig. S12.** Epi-fluorescence micrographs of POM-POSS hybrid material inhibited bacterial growth in a time-dependent manner using dual staining of FITC and PI at ambient conditions, (a) after 5 mins at dark conditions, (b) sunlight exposure to tested photoreactor medium (POM-POSS hybrid and *E.coli* cells) at 30 mins and (c) over the 60 mins of sunlight exposure.

**Table. S2.** Comparison of photocatalytic H<sub>2</sub> production with POM-based catalysts

| S.No | POM-based catalyst                                                                                                                                                                                            | Co-catalyst | Irradiance source                            | Sacrificial donor | Amount of H <sub>2</sub> production (μmol g <sup>-1</sup> h <sup>-1</sup> ) | Ref              |
|------|---------------------------------------------------------------------------------------------------------------------------------------------------------------------------------------------------------------|-------------|----------------------------------------------|-------------------|-----------------------------------------------------------------------------|------------------|
| 1    | Co/Zn-POM                                                                                                                                                                                                     | –           | 300 W Xenon Lamp                             | TEOA              | 2000                                                                        | 1                |
| 2    | AgBr/PMo <sub>12</sub> /GO                                                                                                                                                                                    | –           | 300 W Xenon lamp (λ > 400 nm).               | TEOA              | 256.0                                                                       | 2                |
| 3    | AgBr/PW <sub>12</sub> /GO                                                                                                                                                                                     | –           | 300 W Xenon lamp (λ > 400 nm).               | TEOA              | 223.2                                                                       | 2                |
| 4    | AgBr/SiW <sub>12</sub> /GO                                                                                                                                                                                    | –           | 300 W Xenon lamp (λ > 400 nm).               | TEOA              | 212.0                                                                       | 2                |
| 5    | AgBr/P <sub>2</sub> W <sub>18</sub> /GO                                                                                                                                                                       | –           | 300 W Xenon lamp (λ > 400 nm).               | TEOA              | 207.2                                                                       | 2                |
| 6    | AgBr/P <sub>2</sub> Mo <sub>18</sub> /GO                                                                                                                                                                      | –           | 300 W Xenon lamp (λ > 400 nm).               | TEOA              | 177.2                                                                       | 2                |
| 7    | Cu-Ni-P <sub>2</sub> W <sub>18</sub> O <sub>62</sub> <sup>6-</sup>                                                                                                                                            | –           | 300 W Xenon Lamp (200-400nm)                 | MeOH              | 833.0                                                                       | 3                |
| 8    | TiO <sub>2</sub> -SiNH <sub>2</sub> -W <sub>11</sub> Pt <sub>2</sub>                                                                                                                                          | Pt          | sunlight of 400 W xenon lamp                 | MeOH              | 4500                                                                        | 4                |
| 9    | [Cu <sup>II</sup> <sub>5</sub> (2-ptz) <sub>6</sub> (H <sub>2</sub> O) <sub>4</sub> (GeW <sub>12</sub> O <sub>40</sub> )]·4H <sub>2</sub> O                                                                   | –           | Xe lamp irradiation (without a light filter) | MeOH              | 3813                                                                        | 5                |
| 10   | [Cu <sup>I</sup> <sub>2</sub> (ppz) <sub>4</sub> ][H <sub>2</sub> GeW <sub>12</sub> O <sub>40</sub> ]·8H <sub>2</sub> O                                                                                       | –           | Xe lamp irradiation (without a light filter) | MeOH              | 500.0                                                                       | 5                |
| 11   | CS <sub>14</sub> K <sub>4</sub> [(Si <sub>4</sub> W <sub>36</sub> Nb <sub>12</sub> O <sub>156</sub> )Cu(H <sub>2</sub> O) <sub>2</sub> ]·47H <sub>2</sub> O                                                   | –           | 500 W Xe lamp                                | MeOH              | 35.50                                                                       | 6                |
| 12   | CS <sub>10</sub> K <sub>8</sub> [(Si <sub>4</sub> W <sub>36</sub> Nb <sub>12</sub> O <sub>156</sub> )Zn(H <sub>2</sub> O) <sub>2</sub> ]·28H <sub>2</sub> O                                                   | –           | 500 W Xe lamp                                | MeOH              | 41.90                                                                       | 6                |
| 13   | CS <sub>16</sub> [(H <sub>2</sub> Si <sub>4</sub> W <sub>36</sub> Nb <sub>12</sub> O <sub>156</sub> )Cd(H <sub>2</sub> O) <sub>2</sub> ]·75H <sub>2</sub> O                                                   | –           | 500 W Xe lamp                                | MeOH              | 61.30                                                                       | 6                |
| 14   | CS <sub>5</sub> K <sub>2</sub> [(Si <sub>2</sub> W <sub>18</sub> Ta <sub>6</sub> O <sub>78</sub> )Cr(H <sub>2</sub> O) <sub>4</sub> ]·8H <sub>2</sub> O                                                       | –           | 300 W Hg lamp                                | MeOH              | 1001                                                                        | 7                |
| 15   | CS <sub>3</sub> K <sub>4</sub> H <sub>2</sub> [(Si <sub>2</sub> W <sub>18</sub> Ta <sub>6</sub> O <sub>78</sub> )FeCl <sub>2</sub> (H <sub>2</sub> O) <sub>2</sub> ]·15H <sub>2</sub> O                       | –           | 300 W Hg lamp                                | MeOH              | 747.8                                                                       | 7                |
| 16   | [SiTa <sub>3</sub> W <sub>9</sub> O <sub>40</sub> ] <sup>7-</sup>                                                                                                                                             | –           | 300 W Hg lamp                                | MeOH              | 26.10                                                                       | 7                |
| 17   | CS <sub>12.5</sub> K <sub>4.5</sub> H[Ta <sub>12</sub> Si <sub>4</sub> W <sub>37</sub> O <sub>158</sub> ]·25H <sub>2</sub> O                                                                                  | Pt          | 500 W Xe lamp                                | MeOH              | 297.5                                                                       | 8                |
| 18   | CS <sub>19</sub> K <sub>2</sub> [(Nb <sub>4</sub> O <sub>6</sub> (SiW <sub>9</sub> Nb <sub>3</sub> O <sub>40</sub> ) <sub>4</sub> ]Cl·27H <sub>2</sub> O                                                      | –           | 150 W Hg lamp                                | MeOH              | 1151.84                                                                     | 9                |
| 19   | Na <sub>27</sub> [Fe <sub>11</sub> (H <sub>2</sub> O) <sub>14</sub> (OH) <sub>2</sub> (W <sub>3</sub> O <sub>10</sub> ) <sub>2</sub> (α-SbW <sub>9</sub> O <sub>33</sub> ) <sub>6</sub> ]·103H <sub>2</sub> O | –           | 250 W high-pressure Hg lamp                  | -                 | 820.0                                                                       | 10               |
| 20   | POM-POSS hybrid                                                                                                                                                                                               | –           | 250 W Xe lamp                                | TEOA              | <b>2461</b>                                                                 | <b>This work</b> |

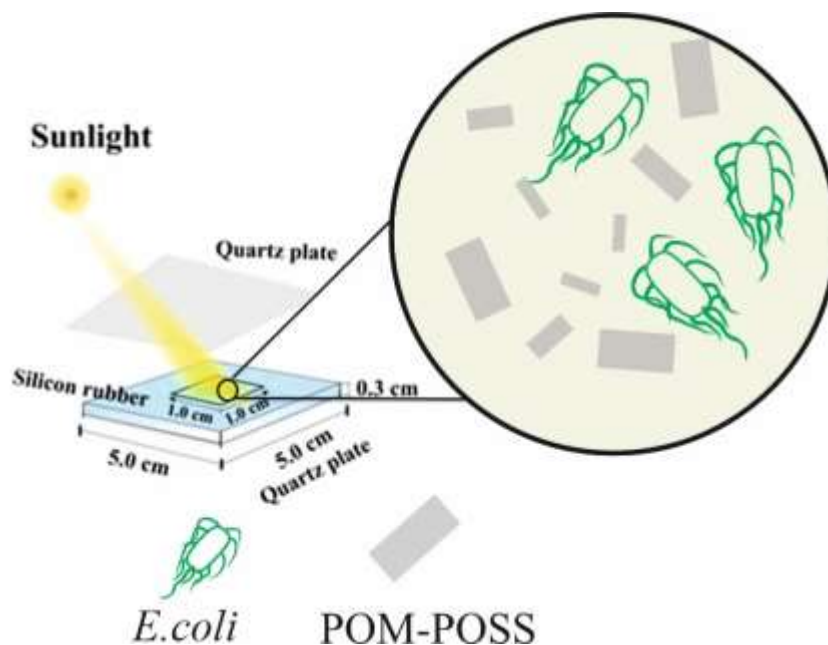

**Fig. S13.** Schematic diagram of the photo-activated antibacterial experiment setup.

### Sample preparation details for Epi-fluorescence microscope

Fluorescein isothiocyanate (FITC) and propidium iodide (PI) double staining were used to identify live and dead cells in bacterial populations. Propidium iodide (PI) enters only damaged cells, binds to DNA and emits red colour, whereas FITC stays outside the undamaged cell wall and produces green luminescence. Approximately 0.5  $\mu$ l of double staining (FITC-PI; 1:1%) was added to solution suspensions (POM-POSS and *E. coli* strains exposed to sunlight) at various time intervals and incubated for 15 min. The excess dye was rinsed with sterile distilled water and examined under an Epi-fluorescence microscope (E200 Coolpix -Nikon, Tokyo, Japan).

## Reference

1. W. Sun, B. An, B. Qi, T. Liu, M. Jin and C. Duan, *ACS Appl. Mater. Interfaces*, 2018, **10**, 13462-13469.
2. X. Gao, J. Wang, Q. Xue, Y.-Y. Ma and Y. Gao, *ACS Appl. Nano Mater.*, 2021, **4**, 2126-2135.
3. W. Sun, C. He, T. Liu and C. Duan, *Chem. Commun.*, 2019, **55**, 3805-3808.
4. Y.-D. Cao, D. Yin, M.-L. Wang, T. Pang, Y. Lv, B. Liu, G.-G. Gao, L. Ma and H. Liu, *Dalton Trans.*, 2020, **49**, 2176-2183.
5. Q. Shen, C. J. Gómez-García, W. Sun, X. Lai, H. Pang and H. Ma, *Green Chem.*, 2021, **23**, 3104-3114.
6. M. Du, H.-Y. Wu, M. Huang, X.-L. Wang, C. Qin, P. Huang and Z.-M. Su, *J Solid State Chem.*, 2019, **277**, 618-623.
7. P. Huang, X.-G. Han, X.-L. Li, C. Qin, X.-L. Wang and Z.-M. Su, *CrystEngComm.*, 2016, **18**, 8722-8725.
8. P. Huang, H.-Y. Wu, M. Huang, M. Du, C. Qin, X.-L. Wang and Z.-M. Su, *Dalton Trans.*, 2017, **46**, 10177-10180.
9. Z.-X. Yang, P. Huang, L. Zhao, M. Zhang, Y.-T. Zhang and Z.-M. Su, *Inorg. Chem. Commun.*, 2014, **44**, 195-197.
10. X. Du, J. Zhao, J. Mi, Y. Ding, P. Zhou, B. Ma, J. Zhao and J. Song, *Nano Energy*, 2015, **16**, 247-255.
